# Supplementary material for: Going with the floe: tracking CESM Large Ensemble sea ice in the Arctic provides context for ship-based observations
Source: Copernicus journal article supplement (doi:10.5194/tc-2019-145), 2019-06-19
Supplement: Supplementary file 1 [file tc-2019-145-supplement.pdf]

*The Cryosphere*

Supporting Information for

**Going with the floe: tracking CESM Large Ensemble sea ice in the Arctic provides context for ship-observations**

**Contents of this file**

Figures S1

**Introduction**

This supporting information provides additional context for the sea ice state and along-track conditions for the CESM-LE model Perennial and Seasonal Arctic conditions.

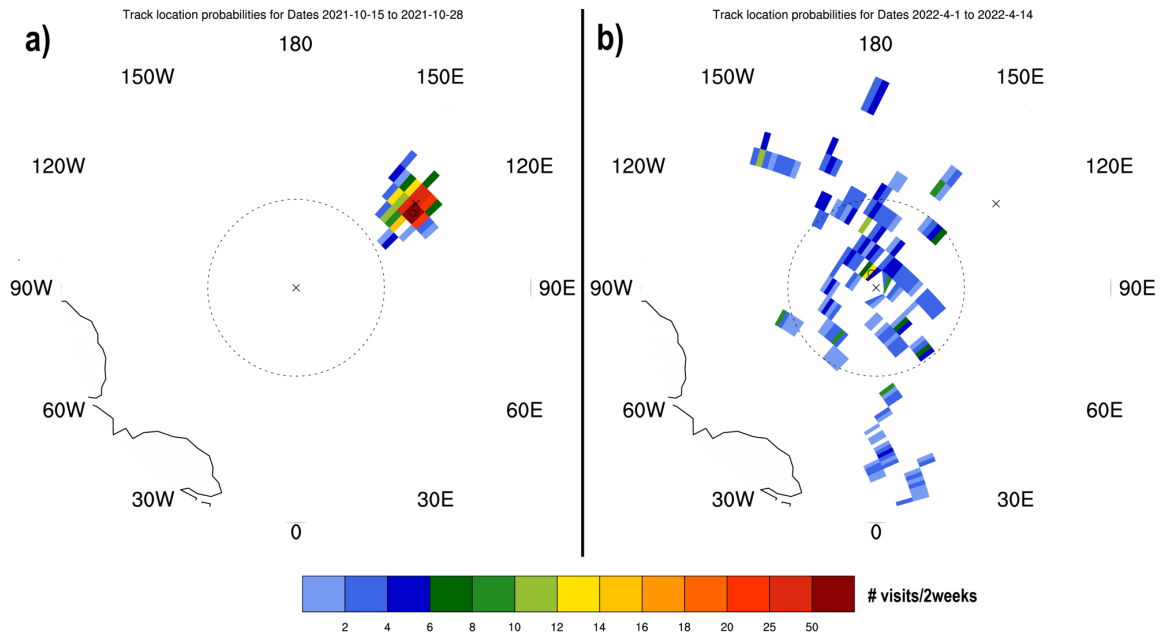

**Figure S1:** Counts of visits to each grid cell by Seasonal Arctic tracks in a two-week period during Oct.15-Oct.28 (a) and Apr.1-Apr.14 (b). Black 'X's mark the starting location of the campaign as well as the North Pole. The Black circle marks the location of highest counts in the two-week time period. The dashed black line at 87°N shows where satellite coverage is not available.
